# Supplementary material
Source: Springer Nature journal article supplement (https://www.springermedizin.de/resource/supplementary/12974_2007_107_MOESM3_ESM.pdf/9600786)

# p38 $\alpha$ MAPK inhibition

**A.**

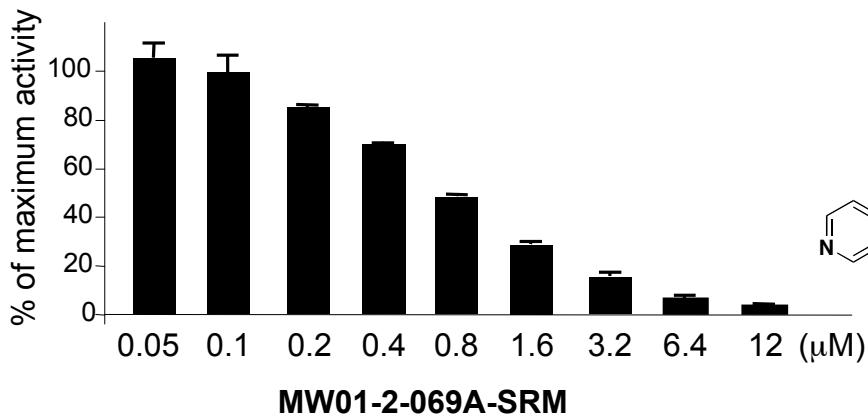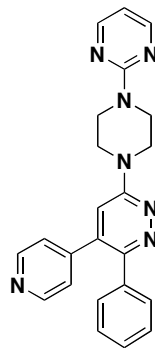

**B.**

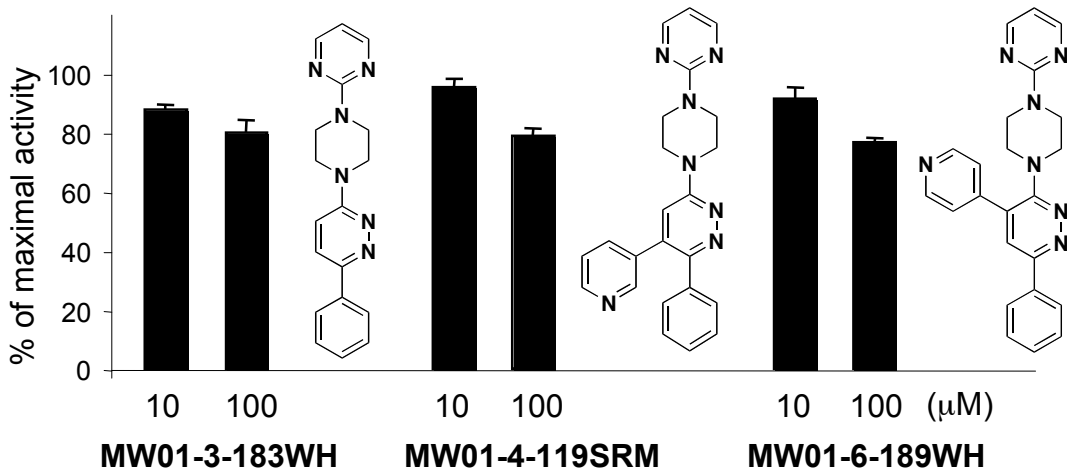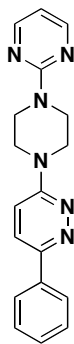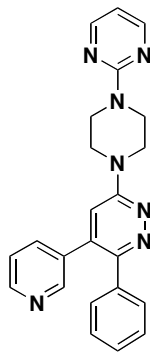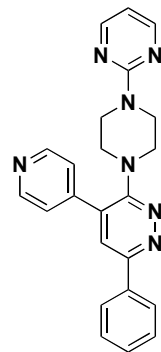

Supplement: MOESM3 [file 9600786]
